# Supplementary material for: Biodegradation of HDPE by Desert Bacteria: Insights from Isolates of the Lut-Desert, the Hottest Place on Earth
Source: Research Square preprint supplement (doi:10.21203/rs.3.rs-7003856/v1), 2025-09-30

**“Online Resource 3: Original uncropped gel image corresponding to Figure 4.”**

This image shows the full, unprocessed agarose gel from which the cropped figure (Figure 4) was generated. The following lanes contain the data presented and discussed in the main manuscript:

**Lane Details:**

- Lanes 1-3: *phosphatase (phoD)* gene amplification (1200 bp) from strain 50 (Lane 1), negative control (Lane 2), and positive control (*Bacillus subtilis*, Lane 3).
- Lanes 4, 8, 12: Molecular weight marker (DNA Ladder).
- Lanes 5-7: *laccase (cotA)* gene amplification (600 bp) from strain 50 (Lane 5), negative control (Lane 6), and positive control (*Bacillus subtilis*, Lane 7).
- Lanes 9-11: *alkane monooxygenase (alkB)* gene amplification (700 bp) from strain 50 (Lane 9), negative control (Lane 10), and positive control (*Bacillus subtilis*, Lane 11).
- Lanes 13-14: Please note: These lanes contain PCR products from a separate, unrelated experiment and are not part of the data discussed in this manuscript.

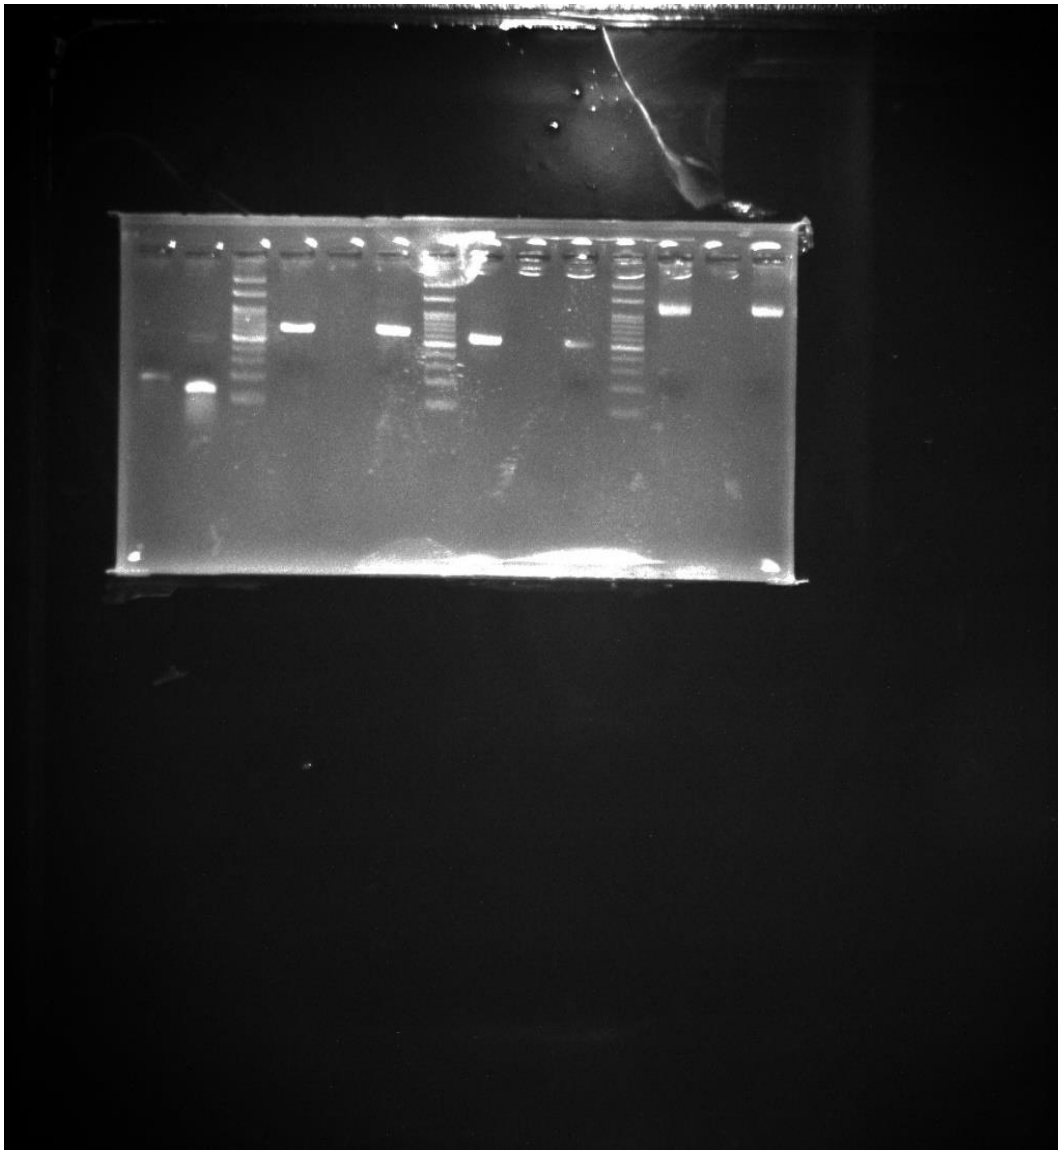

Supplement: Supplementary file 1 [file 17b03a91e041cbe53a233e8d.pdf]
