# Supplementary material for: Biodegradation of HDPE by Desert Bacteria: Insights from Isolates of the Lut-Desert, the Hottest Place on Earth
Source: Research Square preprint supplement (doi:10.21203/rs.3.rs-7003856/v1), 2025-09-30
Supplement: Supplementary file 1 [file 42040ab9bffd5a052881c3e0.docx]

**Table 2** Cultural, morphological, and biochemical characteristics of bacterial isolates from the Lut Desert

| test | Colony form | Colony color | Colony elevation | Gram reaction | oxidase | spore | Hemolysis | MR | VP | Catalase | Gelatin hydrolysis | Motility | Urea hydrolysis | Glucose | Lactose | Citrate utilization |
| --- | --- | --- | --- | --- | --- | --- | --- | --- | --- | --- | --- | --- | --- | --- | --- | --- |
| strain |
| 1 | C | Cw | Co | + | - | + | β | - | + | + | + | + | - | + | - | + |
| 2 | I | Cw | F | + | - | + | β | - | + | + | - | + | - | + | - | + |
| 3 | C | Cw | F | + | - | + | γ | + | - | + | + | - | + | + | - | - |
| 4 | C | Cw | Co | + | + | + | α | + | - | + | - | - | - | + | - | + |
| 5 | I | Cw | F | + | - | + | β | - | + | + | + | + | - | + | - | + |
| 6 | C | Cw | Co | + | + | + | α | + | - | + | + | + | - | + | + | - |
| 7 | C | Cw | F | + | - | + | α | + | + | + | - | - | - | + | - | + |
| 8 | I | Cw | Co | + | - | + | β | - | + | + | + | + | - | + | - | + |
| 9 | C | Cw | F | + | - | + | β | - | - | + | - | + | - | + | - | + |
| 10 | C | Cw | F | + | - | + | β | - | + | + | + | + | - | + | + | - |
| 11 | C | Cw | F | + | - | + | β | - | + | + | - | + | - | + | - | + |
| 12 | I | Cw | Co | + | - | + | β | - | + | + | + | + | + | + | - | + |
| 13 | I | Cw | F | + | - | + | α | - | + | + | + | - | - | + | - | - |
| 14 | C | Cw | Co | + | + | + | α | - | - | + | - | - | - | + | - | + |
| 15 | C | Cw | F | + | + | + | γ | - | + | + | + | - | + | + | + | + |
| 16 | C | Cw | F | + | - | + | γ | + | - | + | + | - | - | + | - | - |
| 17 | I | Cw | F | + | - | + | β | - | + | + | + | + | - | + | - | - |
| 18 | C | Cw | Co | + | + | + | γ | - | + | + | - | - | - | + | + | + |
| 19 | I | Cw | F | + | - | + | β | - | + | + | + | + | - | + | - | - |
| 20 | I | Cw | F | + | + | + | α | - | + | + | + | - | - | + | - | + |
| 21 | C | Cw | Co | + | + | + | β | - | + | + | + | + | - | + | - | + |
| 22 | I | Cw | F | + | - | + | α | + | - | + | - | - | - | + | - | + |
| 23 | I | Cw | F | + | + | + | α | + | - | + | + | - | + | + | - | - |
| 24 | C | Cw | Co | + | - | + | β | - | + | + | - | + | - | + | - | + |
| 25 | I | Cw | F | + | - | + | γ | + | - | + | + | - | - | + | - | + |
| 26 | C | Cw | Co | + | + | + | α | - | - | + | + | + | - | + | + | - |
| 27 | C | Cw | F | + | + | + | γ | - | + | + | - | - | - | + | - | - |
| 28 | I | Cw | Co | + | - | + | α | - | + | + | + | - | - | + | - | + |
| 29 | C | Cw | F | + | - | + | β | - | + | + | - | + | - | + | - | - |
| 30 | C | Cw | F | + | + | + | γ | - | + | + | + | - | - | + | + | + |
| 31 | C | Cw | F | + | - | + | β | - | + | + | - | + | - | + | - | - |
| 32 | I | Cw | Co | + | - | + | β | - | + | + | + | + | + | + | - | + |
| 33 | I | Cw | F | + | - | + | γ | - | + | + | + | - | - | + | - | + |
| 34 | C | Cw | Co | + | + | + | γ | - | + | + | - | - | - | + | - | + |
| 35 | C | Cw | F | + | + | + | α | + | + | + | + | - | + | + | + | + |
| 36 | C | Cw | Co | + | - | + | β | + | - | + | + | + | - | + | - | + |
| 37 | I | Cw | F | + | - | + | β | - | + | + | - | + | - | + | - | + |
| 38 | C | Cw | F | + | + | + | γ | - | + | + | + | - | + | + | - | - |
| 39 | C | Cw | Co | + | - | + | γ | - | + | + | - | + | - | + | + | + |
| 40 | I | Cw | F | + | + | + | α | - | + | + | + | - | - | + | - | + |
| 41 | C | Cw | Co | + | + | + | α | - | + | + | + | + | - | + | + | - |
| 42 | C | Cw | F | + | - | + | α | - | + | + | - | - | - | + | - | + |
| 43 | I | Cw | Co | + | - | + | β | - | + | + | + | + | - | + | + | + |
| 44 | C | Cw | F | + | - | + | β | - | + | + | - | + | - | + | + | - |
| 45 | C | Cw | F | + | - | + | γ | + | - | + | + | - | - | + | + | + |
| 46 | C | Cw | F | + | + | + | β | - | + | + | - | + | - | + | + | - |
| 47 | I | Cw | Co | + | - | + | α | + | - | + | + | - | + | + | + | + |
| 48 | I | Cw | F | + | - | + | β | - | + | + | + | + | - | + | - | + |
| 49 | C | Cw | Co | + | - | + | α | - | + | + | - | - | - | + | + | - |
| 50 | I | Cw | F | + | - | + | β | - | + | + | - | + | - | + | - | - |

C=Circular; I=Irregular; Cw=Cream white; Co=Convex; F=Flat
