# Supplementary material for: Biodegradation of HDPE by Desert Bacteria: Insights from Isolates of the Lut-Desert, the Hottest Place on Earth
Source: Research Square preprint supplement (doi:10.21203/rs.3.rs-7003856/v1), 2025-09-30
Supplement: Supplementary file 2 [file 4a38569b7408817e86b12305.docx]

Table 1 Geographical coordinates of sampled areas

| UTM coordinates | latitude | Longitude | Row |
| --- | --- | --- | --- |
| 40R 573771 3408124 | 30.803902687091 | 57.771161112198 | 1 |
| 40R 573841 3407868 | 30.801588525723 | 57.771874336241 | 2 |
| 40R 573840 3407874 | 30.801642724052 | 57.771864316499 | 3 |
| 40R 573842 3407879 | 30.801687712962 | 57.771885581852 | 4 |
| 40R 573824 3407860 | 30.801517402338 | 57.771696068795 | 5 |
| 40R 573841 3407876 | 30.801660707167 | 57.771874913118 | 6 |
| 40R 573839 3407887 | 30.801760081143 | 57.771854801503 | 7 |
| 40R 573841 3407886 | 30.801750933971 | 57.771875634218 | 8 |
| 40R 573829 3407878 | 30.801679499424 | 57.77174962849 | 9 |
| 40R 573798 3407769 | 30.800697955998 | 57.771417748738 | 10 |
| 40R 573834 3407865 | 30.801561893383 | 57.771800953174 | 11 |
| 40R 573780 3407505 | 30.798317086803 | 57.771210588135 | 12 |
| 40R 573775 3407475 | 30.798046717122 | 57.771156166941 | 13 |
| 40R 573722 3407484 | 30.798131215769 | 57.770602858059 | 14 |
| 40R 573475 3407774 | 30.800763118587 | 57.768042013293 | 15 |
| 40R 573474 3407731 | 30.800375204846 | 57.768028475835 | 16 |
| 40R 573482 3407707 | 30.800158164779 | 57.768110371909 | 17 |
| 40R 573483 3407673 | 30.799851331354 | 57.768118384511 | 18 |
| 40R 573953 3407453 | 30.797837136374 | 57.773015036128 | 19 |
| 40R 573961 3407443 | 30.797746410864 | 57.773097929879 | 20 |
| 40R 573965 3407413 | 30.797475481004 | 57.773137571291 | 21 |
| 40R 573850 3406999 | 30.793747251446 | 57.771905749225 | 22 |
| 40R 573957 3406992 | 30.79367742871 | 57.773023559049 | 23 |
| 40R 573860 3406972 | 30.793503016392 | 57.772008317995 | 24 |
| 40R 573789 3406972 | 30.793507433473 | 57.771266260075 | 25 |
| 40R 573810 3407023 | 30.793966284763 | 57.771489416613 | 26 |
| 40R 573617 3405586 | 30.781012646269 | 57.769369028579 | 27 |
| 40R 572758 3402317 | 30.751570216144 | 57.760160456684 | 28 |
| 40R 573841 3407886 | 30.801750933971 | 57.771875634218 | 29 |
| 40R 573745 3408281 | 30.805320864331 | 57.770900651577 | 30 |
| 40R 573741 3407843 | 30.801369179053 | 57.77082729639 | 31 |
